# Supplementary material
Source: publisher figshare collection journal article supplement (https://diabetesjournals.figshare.com/articles/dataset/_/22087064)
Supplement: Supplementary file 2 [file 1]

**Supplementary Table 1-Unadjusted associations of prenatal, perinatal, and early childhood factors with metabolic phenotypes of obesity (group of MHNW as the reference)**

|                                                          | MUNW              |          | MHO                 |          | MUO                |          |
|----------------------------------------------------------|-------------------|----------|---------------------|----------|--------------------|----------|
|                                                          | OR (95%CI)        | <i>P</i> | OR (95%CI)          | <i>P</i> | OR (95%CI)         | <i>P</i> |
| <b>Maternal age at delivery (year)</b>                   |                   |          |                     |          |                    |          |
| <35                                                      | 1                 |          | 1                   |          | 1                  |          |
| ≥35                                                      | 0.93 (0.65, 1.34) | 0.704    | 0.86 (0.31, 2.39)   | 0.770    | 0.39 (0.05, 2.83)  | 0.348    |
| <b>Maternal education</b>                                |                   |          |                     |          |                    |          |
| High School or less                                      | 1                 |          | 1                   |          | 1                  |          |
| College                                                  | 1.30 (0.96, 1.76) | 0.092    | 0.66 (0.35, 1.25)   | 0.200    | 0.94 (0.37, 2.44)  | 0.905    |
| Above college                                            | 1.37 (0.94, 1.99) | 0.104    | 0.30 (0.10, 0.96)   | 0.041    | 0.36 (0.07, 1.90)  | 0.230    |
| <b>Annual family income (RMB)</b>                        |                   |          |                     |          |                    |          |
| <10,000                                                  | 1                 |          | 1                   |          | 1                  |          |
| 10,000-20,000                                            | 0.94 (0.76, 1.18) | 0.609    | 0.95 (0.52, 1.74)   | 0.874    | 1.49 (0.60, 3.74)  | 0.392    |
| ≥20,000                                                  | 0.88 (0.69, 1.12) | 0.299    | 1.03 (0.54, 1.95)   | 0.937    | 1.48 (0.56, 3.93)  | 0.429    |
| <b>Prepregnancy BMI (kg/m<sup>2</sup>)</b>               |                   |          |                     |          |                    |          |
| <18.5                                                    | 0.90 (0.66, 1.22) | 0.499    | 0.99 (0.28, 3.44)   | 0.984    | 0.55 (0.07, 4.35)  | 0.570    |
| 18~23                                                    | 1                 |          | 1                   |          | 1                  |          |
| 23~27.5                                                  | 1.13 (0.92, 1.38) | 0.262    | 3.68 (1.94, 6.98)   | <0.001   | 3.64 (1.60, 8.28)  | 0.002    |
| ≥27.5                                                    | 1.30 (0.94, 1.80) | 0.110    | 11.30 (5.77, 22.13) | <0.001   | 9.01 (3.67, 22.09) | <0.001   |
| <b>Gestational weight gain</b>                           |                   |          |                     |          |                    |          |
| Inadequate                                               | 0.91 (0.74, 1.12) | 0.386    | 0.77 (0.40, 1.49)   | 0.433    | 0.40 (0.14, 1.12)  | 0.081    |
| Appropriate                                              | 1                 |          | 1                   |          | 1                  |          |
| Excessive                                                | 1.07 (0.86, 1.34) | 0.544    | 2.41 (1.38, 4.20)   | 0.002    | 2.19 (1.08, 4.45)  | 0.029    |
| <b>Maternal history of gestational diabetes mellitus</b> |                   |          |                     |          |                    |          |
| Without                                                  | 1                 |          | 1                   |          | 1                  |          |

|                                                 |                   |       |                   |        |                    |       |
|-------------------------------------------------|-------------------|-------|-------------------|--------|--------------------|-------|
| With                                            | 1.09 (0.78, 1.54) | 0.609 | 1.11 (0.44, 2.80) | 0.823  | 2.63 (1.09, 6.37)  | 0.032 |
| <b>Gravidity</b>                                |                   |       |                   |        |                    |       |
| 1                                               | 1                 |       | 1                 |        | 1                  |       |
| ≥2                                              | 1.09 (0.91, 1.32) | 0.363 | 2.01 (1.24, 3.26) | 0.005  | 1.15 (0.58, 2.28)  | 0.684 |
| <b>Delivery mode</b>                            |                   |       |                   |        |                    |       |
| Vaginal delivery                                | 1                 |       | 1                 |        | 1                  |       |
| Cesarean delivery                               | 0.92 (0.78, 1.10) | 0.369 | 1.55 (0.96, 2.51) | 0.075  | 1.43 (0.75, 2.71)  | 0.278 |
| <b>Gestational age</b>                          |                   |       |                   |        |                    |       |
| Preterm                                         | 1.24 (0.78, 1.96) | 0.364 | 0.86 (0.21, 3.59) | 0.840  | 3.41 (1.18, 9.83)  | 0.023 |
| Full-term                                       | 1                 |       | 1                 |        | 1                  |       |
| <b>Paternal education</b>                       |                   |       |                   |        |                    |       |
| High School or less                             | 1                 |       | 1                 |        | 1                  |       |
| College                                         | 1.13 (0.85, 1.49) | 0.400 | 0.68 (0.36, 1.28) | 0.231  | 1.00 (0.39, 2.61)  | 0.994 |
| Above college                                   | 1.19 (0.84, 1.69) | 0.321 | 0.45 (0.17, 1.23) | 0.119  | 0.91 (0.26, 3.17)  | 0.878 |
| <b>Family history of metabolic disturbances</b> |                   |       |                   |        |                    |       |
| Without                                         | 1                 |       | 1                 |        | 1                  |       |
| With                                            | 0.94 (0.79, 1.12) | 0.461 | 1.05 (0.66, 1.69) | 0.837  | 1.04 (0.55, 1.95)  | 0.916 |
| <b>Child sex</b>                                |                   |       |                   |        |                    |       |
| Male                                            | 0.84 (0.71, 1.00) | 0.047 | 1.35 (0.85, 2.16) | 0.208  | 1.27 (0.68, 2.38)  | 0.452 |
| Female                                          | 1                 |       | 1                 |        | 1                  |       |
| <b>Birth weight (g)</b>                         |                   |       |                   |        |                    |       |
| <2500                                           | 1.07 (0.60, 1.89) | 0.828 | 0.75 (0.10, 5.53) | 0.777  | 2.66 (0.62, 11.43) | 0.189 |
| 2500~3999                                       | 1                 |       | 1                 |        | 1                  |       |
| ≥4000                                           | 0.92 (0.67, 1.27) | 0.612 | 3.72 (2.16, 6.4)  | <0.001 | 2.78 (1.26, 6.13)  | 0.012 |
| <b>Breastfeeding duration (month)</b>           |                   |       |                   |        |                    |       |
| <6                                              | 1                 |       | 1                 |        | 1                  |       |

|          |                   |       |                  |       |                   |       |
|----------|-------------------|-------|------------------|-------|-------------------|-------|
| $\geq 6$ | 0.98 (0.82, 1.16) | 0.777 | 0.93 (0.58, 1.5) | 0.769 | 0.49 (0.26, 0.92) | 0.027 |
|----------|-------------------|-------|------------------|-------|-------------------|-------|

---
