# Supplementary material
Source: publisher figshare collection journal article supplement (https://diabetesjournals.figshare.com/articles/dataset/_/22087064)
Supplement: Supplementary file 3 [file 1]

**Supplementary Table 3-Adjusted associations of prenatal, perinatal, and early childhood factors with metabolic phenotypes of obesity (group of MHNW as the reference), according to the criterion as UA  $\geq 5.5$  mg/dL (327 $\mu$ mol/L) to define the high UA levels\***

|                                                          | MUNW              |          | MHO                 |          | MUO                |          |
|----------------------------------------------------------|-------------------|----------|---------------------|----------|--------------------|----------|
|                                                          | OR (95%CI)        | <i>P</i> | OR (95%CI)          | <i>P</i> | OR (95%CI)         | <i>P</i> |
| <b>Maternal age at delivery (year)</b>                   |                   |          |                     |          |                    |          |
| <35                                                      | 1                 |          | 1                   |          | 1                  |          |
| ≥35                                                      | 0.87 (0.60, 1.25) | 0.444    | 0.35 (0.09, 1.38)   | 0.134    | 0.59 (0.13, 2.65)  | 0.495    |
| <b>Maternal education</b>                                |                   |          |                     |          |                    |          |
| High School or less                                      | 1                 |          | 1                   |          | 1                  |          |
| Undergraduate                                            | 1.28 (0.91, 1.81) | 0.156    | 0.74 (0.30, 1.82)   | 0.513    | 1.09 (0.34, 3.51)  | 0.882    |
| Graduate or above                                        | 1.40 (0.90, 2.19) | 0.139    | 0.42 (0.10, 1.85)   | 0.252    | 0.37 (0.05, 2.56)  | 0.315    |
| <b>Annual family income (RMB)</b>                        |                   |          |                     |          |                    |          |
| <10,000                                                  | 1                 |          | 1                   |          | 1                  |          |
| 10,000-20,000                                            | 0.88 (0.71, 1.10) | 0.251    | 1.14 (0.56, 2.28)   | 0.723    | 1.82 (0.74, 4.49)  | 0.195    |
| ≥20,000                                                  | 0.78 (0.61, 1.00) | 0.049    | 1.58 (0.74, 3.38)   | 0.240    | 2.09 (0.79, 5.55)  | 0.139    |
| <b>Prepregnancy BMI (kg/m<sup>2</sup>)</b>               |                   |          |                     |          |                    |          |
| <18.5                                                    | 0.90 (0.67, 1.21) | 0.490    | 1.42 (0.38, 5.27)   | 0.602    | 0.58 (0.07, 4.63)  | 0.609    |
| 18~23                                                    | 1                 |          | 1                   |          | 1                  |          |
| 23~27.5                                                  | 1.12 (0.90, 1.40) | 0.296    | 3.84 (1.77, 8.35)   | 0.001    | 2.10 (0.92, 4.79)  | 0.077    |
| ≥27.5                                                    | 1.31 (0.93, 1.84) | 0.117    | 11.22 (4.86, 25.88) | <0.001   | 4.35 (1.62, 11.66) | 0.004    |
| <b>Gestational weight gain</b>                           |                   |          |                     |          |                    |          |
| Inadequate                                               | 0.95 (0.77, 1.16) | 0.612    | 1.20 (0.55, 2.64)   | 0.643    | 0.58 (0.21, 1.61)  | 0.296    |
| Appropriate                                              | 1                 |          | 1                   |          | 1                  |          |
| Excessive                                                | 1.03 (1.03, 1.29) | 0.816    | 1.49 (0.77, 2.90)   | 0.236    | 1.86 (0.89, 3.89)  | 0.099    |
| <b>Maternal history of gestational diabetes mellitus</b> |                   |          |                     |          |                    |          |

|                                                 |                   |       |                    |       |                   |       |
|-------------------------------------------------|-------------------|-------|--------------------|-------|-------------------|-------|
| Without                                         | 1                 |       | 1                  |       | 1                 |       |
| With                                            | 1.01 (0.72, 1.42) | 0.964 | 0.42 (0.12, 1.48)  | 0.179 | 2.21 (0.91, 5.36) | 0.080 |
| <b>Gravidity</b>                                |                   |       |                    |       |                   |       |
| 1                                               | 1                 |       | 1                  |       | 1                 |       |
| ≥2                                              | 1.14 (0.95, 1.38) | 0.169 | 1.88 (1.07, 3.32)  | 0.030 | 0.93 (0.46, 1.88) | 0.847 |
| <b>Delivery mode</b>                            |                   |       |                    |       |                   |       |
| Vaginal delivery                                | 1                 |       | 1                  |       | 1                 |       |
| Cesarean delivery                               | 0.93 (0.78, 1.10) | 0.382 | 0.93 (0.52, 1.64)  | 0.791 | 1.26 (0.64, 2.48) | 0.508 |
| <b>Gestational age</b>                          |                   |       |                    |       |                   |       |
| Preterm                                         | 1.11 (0.65, 1.91) | 0.697 | 0.68 (0.12, 3.90)  | 0.662 | 2.31 (0.58, 9.16) | 0.234 |
| Full-term                                       | 1                 |       | 1                  |       | 1                 |       |
| <b>Paternal education</b>                       |                   |       |                    |       |                   |       |
| High School or less                             | 1                 |       | 1                  |       | 1                 |       |
| Undergraduate                                   | 1.05 (0.76, 1.43) | 0.782 | 1.23 (0.50, 3.02)  | 0.647 | 1.00 (0.34, 2.93) | 0.998 |
| Graduate or above                               | 1.12 (0.74, 1.69) | 0.590 | 1.14 (0.31, 4.25)  | 0.842 | 1.19 (0.28, 5.10) | 0.817 |
| <b>Family history of metabolic disturbances</b> |                   |       |                    |       |                   |       |
| Without                                         | 1                 |       | 1                  |       | 1                 |       |
| With                                            | 0.94 (0.79, 1.12) | 0.491 | 0.87 (0.50, 1.53)  | 0.633 | 0.60 (0.31, 1.17) | 0.131 |
| <b>Child sex</b>                                |                   |       |                    |       |                   |       |
| Male                                            | 0.91 (0.77, 1.08) | 0.294 | 1.09 (0.64, 1.87)  | 0.753 | 1.53 (0.80, 2.94) | 0.203 |
| Female                                          | 1                 |       | 1                  |       | 1                 |       |
| <b>Birth weight (g)</b>                         |                   |       |                    |       |                   |       |
| <2500                                           | 1.20 (0.63, 2.28) | 0.590 | 1.23 (0.12, 12.27) | 0.858 | 1.37 (0.20, 9.37) | 0.750 |
| 2500~3999                                       | 1                 |       | 1                  |       | 1                 |       |
| ≥4000                                           | 0.92 (0.77, 1.26) | 0.598 | 2.89 (1.52, 5.52)  | 0.001 | 1.39 (0.59, 3.30) | 0.456 |

| Breastfeeding duration (month) |                   |       |                   |       |                   |       |
|--------------------------------|-------------------|-------|-------------------|-------|-------------------|-------|
| <6                             | 1                 |       | 1                 |       | 1                 |       |
| ≥6                             | 0.98 (0.82, 1.17) | 0.826 | 0.89 (0.52, 1.52) | 0.659 | 0.63 (0.33, 1.19) | 0.153 |

\*2118 (70.2%), 781 (25.9%), 69 (2.3%), and 47 (1.6%) children were classified as MHNW, MUNW, MHO, and MUO, respectively.
