# Supplementary material
Source: publisher figshare collection journal article supplement (https://diabetesjournals.figshare.com/articles/dataset/_/22087064)
Supplement: Supplementary file 6 [file 1]

**Supplementary Table 5-Adjusted associations of prenatal, perinatal, and early childhood factors with metabolic phenotypes of obesity (group of MHNW as the reference), according to the cutoff points established by the World Obesity Federation to categorize childhood BMI status\***

|                                                          | MUNW              |       | MHO               |        | MUO               |       |
|----------------------------------------------------------|-------------------|-------|-------------------|--------|-------------------|-------|
|                                                          | OR (95%CI)        | P     | OR (95%CI)        | P      | OR (95%CI)        | P     |
| <b>Maternal age at delivery (year)</b>                   |                   |       |                   |        |                   |       |
| <35                                                      | 1                 |       | 1                 |        | 1                 |       |
| ≥35                                                      | 0.93 (0.63, 1.36) | 0.695 | 0.67 (0.30, 1.50) | 0.332  | 0.39 (0.09, 1.68) | 0.204 |
| <b>Maternal education</b>                                |                   |       |                   |        |                   |       |
| High School or less                                      | 1                 |       | 1                 |        | 1                 |       |
| Undergraduate                                            | 1.37 (0.94, 1.98) | 0.102 | 0.90 (0.47, 1.71) | 0.742  | 1.41 (0.49, 4.05) | 0.519 |
| Graduate or above                                        | 1.55 (0.96, 2.50) | 0.074 | 1.19 (0.47, 2.98) | 0.718  | 0.50 (0.10, 2.57) | 0.404 |
| <b>Annual family income (RMB)</b>                        |                   |       |                   |        |                   |       |
| <10,000                                                  | 1                 |       | 1                 |        | 1                 |       |
| 10,000-20,000                                            | 0.92 (0.73, 1.17) | 0.494 | 1.20 (0.75, 1.95) | 0.448  | 1.34 (0.68, 2.66) | 0.402 |
| ≥20,000                                                  | 0.83 (0.64, 1.09) | 0.176 | 1.39 (0.82, 2.37) | 0.219  | 1.52 (0.72, 3.22) | 0.269 |
| <b>Prepregnancy BMI (kg/m<sup>2</sup>)</b>               |                   |       |                   |        |                   |       |
| <18.5                                                    | 0.94 (0.69, 1.29) | 0.712 | 0.85 (0.35, 2.07) | 0.727  | 0.47 (0.11, 2.04) | 0.315 |
| 18~23                                                    | 1                 |       | 1                 |        | 1                 |       |
| 23~27.5                                                  | 1.14 (0.90, 1.44) | 0.270 | 2.03 (1.27, 3.22) | 0.003  | 1.40 (0.74, 2.66) | 0.307 |
| ≥27.5                                                    | 1.32 (0.92, 1.89) | 0.138 | 3.56 (2.02, 6.29) | <0.001 | 3.20 (1.47, 6.94) | 0.003 |
| <b>Gestational weight gain</b>                           |                   |       |                   |        |                   |       |
| Inadequate                                               | 0.92 (0.74, 1.14) | 0.423 | 0.49 (0.28, 0.86) | 0.012  | 0.77 (0.38, 1.55) | 0.461 |
| Appropriate                                              | 1                 |       | 1                 |        | 1                 |       |
| Excessive                                                | 1.04 (0.82, 1.34) | 0.730 | 1.27 (0.82, 1.95) | 0.284  | 1.51 (0.81, 2.84) | 0.197 |
| <b>Maternal history of gestational diabetes mellitus</b> |                   |       |                   |        |                   |       |
| Without                                                  | 1                 |       | 1                 |        | 1                 |       |

|                                                 |                   |       |                   |       |                   |       |
|-------------------------------------------------|-------------------|-------|-------------------|-------|-------------------|-------|
| With                                            | 1.09 (0.76, 1.56) | 0.637 | 0.56 (0.24, 1.27) | 0.163 | 1.23 (0.51, 2.97) | 0.649 |
| <b>Gravidity</b>                                |                   |       |                   |       |                   |       |
| 1                                               | 1                 |       | 1                 |       | 1                 |       |
| ≥2                                              | 1.13 (0.92, 1.38) | 0.252 | 1.28 (0.86, 1.90) | 0.227 | 1.21 (0.70, 2.09) | 0.491 |
| <b>Delivery mode</b>                            |                   |       |                   |       |                   |       |
| Vaginal delivery                                | 1                 |       | 1                 |       | 1                 |       |
| Cesarean delivery                               | 0.89 (0.74, 1.07) | 0.203 | 1.06 (0.72, 1.56) | 0.772 | 1.10 (0.64, 1.89) | 0.741 |
| <b>Gestational age</b>                          |                   |       |                   |       |                   |       |
| Preterm                                         | 1.36 (0.77, 2.39) | 0.288 | 1.74 (0.63, 4.85) | 0.287 | 1.87 (0.51, 6.92) | 0.346 |
| Full-term                                       | 1                 |       | 1                 |       | 1                 |       |
| <b>Paternal education</b>                       |                   |       |                   |       |                   |       |
| High School or less                             | 1                 |       | 1                 |       | 1                 |       |
| Undergraduate                                   | 1.04 (0.75, 1.46) | 0.807 | 0.98 (0.53, 1.80) | 0.939 | 1.47 (0.56, 3.84) | 0.433 |
| Graduate or above                               | 1.09 (0.70, 1.68) | 0.713 | 0.44 (0.17, 1.15) | 0.093 | 1.71 (0.49, 5.89) | 0.398 |
| <b>Family history of metabolic disturbances</b> |                   |       |                   |       |                   |       |
| Without                                         | 1                 |       | 1                 |       | 1                 |       |
| With                                            | 0.92 (0.76, 1.10) | 0.347 | 0.85 (0.58, 1.24) | 0.401 | 0.71 (0.42, 1.21) | 0.210 |
| <b>Child sex</b>                                |                   |       |                   |       |                   |       |
| Male                                            | 0.83 (0.69, 0.99) | 0.040 | 1.09 (0.75, 1.57) | 0.653 | 1.19 (0.71, 1.98) | 0.510 |
| Female                                          | 1                 |       | 1                 |       | 1                 |       |
| <b>Birth weight (g)</b>                         |                   |       |                   |       |                   |       |
| <2500                                           | 1.00 (0.50, 2.02) | 0.993 | 1.3 (0.36, 4.74)  | 0.693 | 1.04 (0.17, 6.42) | 0.965 |
| 2500~3999                                       | 1                 |       | 1                 |       | 1                 |       |
| ≥4000                                           | 0.85 (0.60, 1.20) | 0.356 | 1.64 (0.98, 2.73) | 0.061 | 1.61 (0.8, 3.25)  | 0.181 |
| <b>Breastfeeding duration (month)</b>           |                   |       |                   |       |                   |       |
| <6                                              | 1                 |       | 1                 |       | 1                 |       |

|          |                   |       |                   |       |                   |       |
|----------|-------------------|-------|-------------------|-------|-------------------|-------|
| $\geq 6$ | 0.95 (0.79, 1.15) | 0.614 | 0.99 (0.68, 1.44) | 0.969 | 0.65 (0.39, 1.08) | 0.097 |
|----------|-------------------|-------|-------------------|-------|-------------------|-------|

---

\*2145 (71.1%), 659 (21.9%), 141 (4.7%), and 70 (2.3%) children were classified as MHNW, MUNW, MHO, and MUO, respectively.
