# Supplementary material
Source: publisher figshare collection journal article supplement (https://diabetesjournals.figshare.com/articles/dataset/_/22087064)

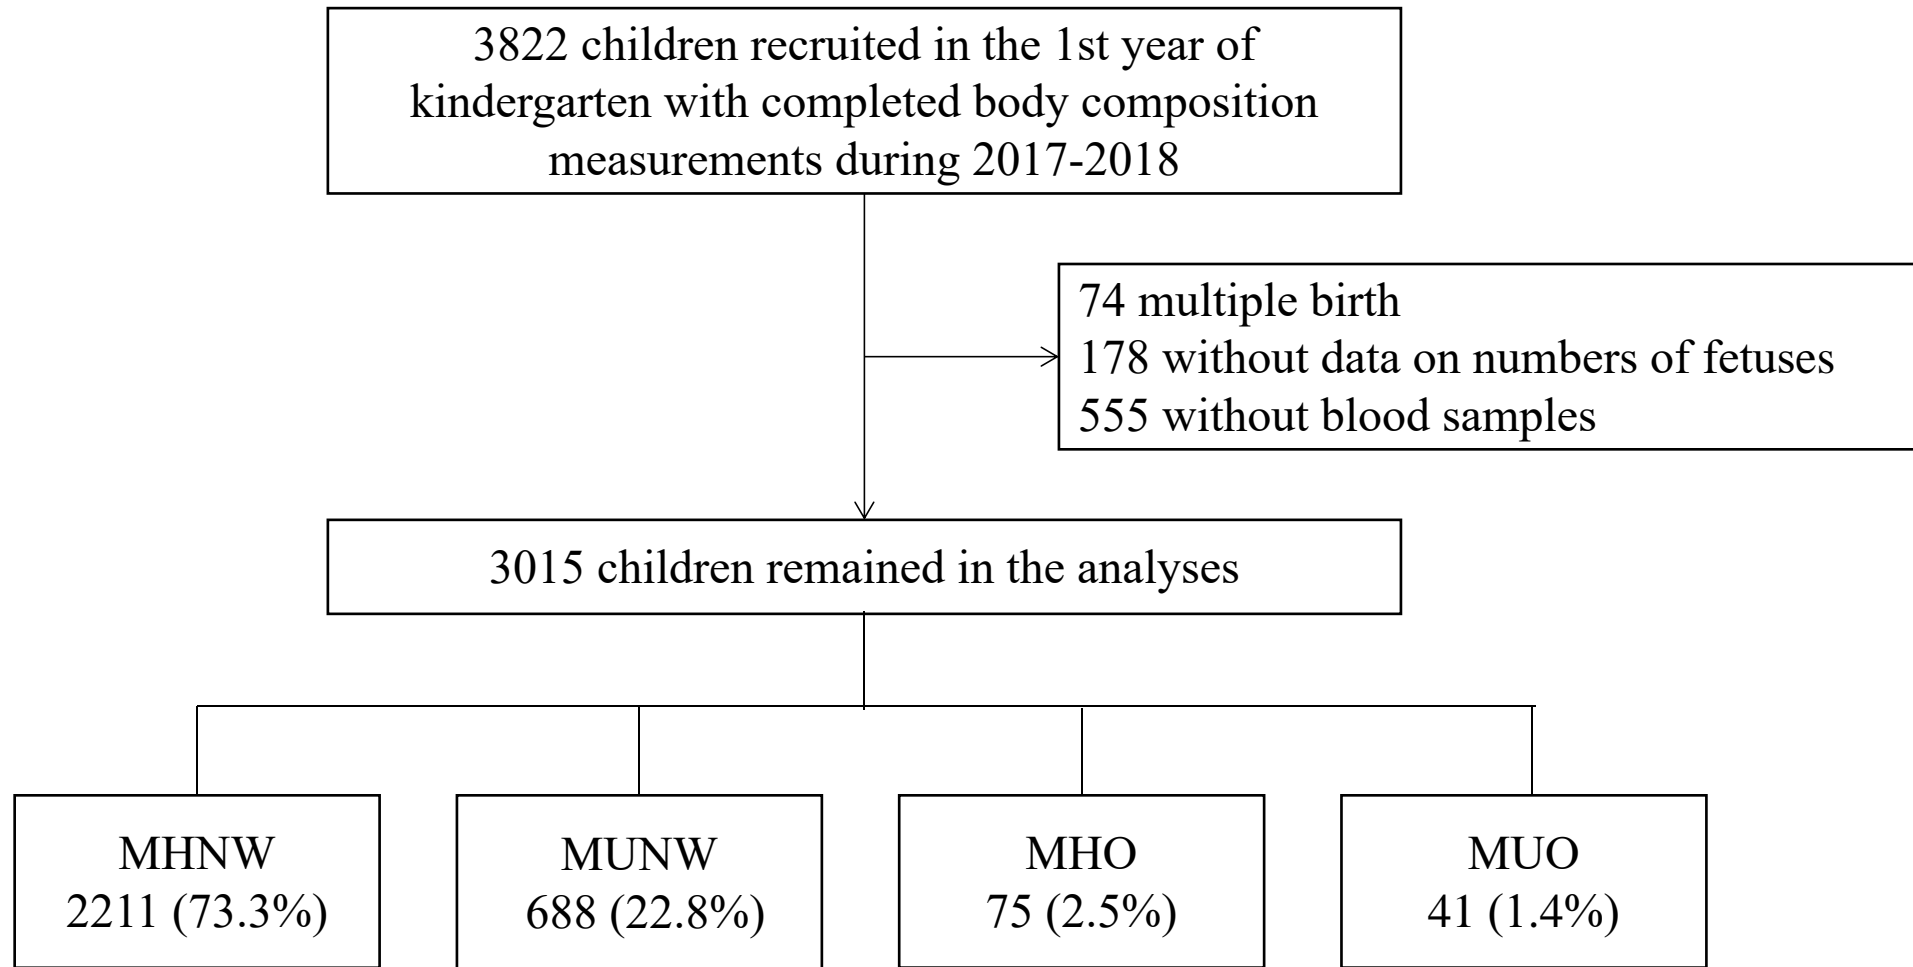

**Supplementary Figure 1-** Flowchart of the study cohort.

Supplement: Supplementary file 4 [file 1]
